# Supplementary material for: A strategy for enhancing the photoactivity of g-C3N4-based single-atom catalysts via sulphur doping: a theoretical study
Source: Royal Society of Chemistry journal article supplement (doi:10.1039/d1cp00192b), 2021-01-01
Supplement: d1cp00192b1.pdf [file d1cp00192b1.pdf]

Electronic Supplementary Information (ESI) for PCCP.

This journal is © The Royal Society of Chemistry 2021

## **A Strategy for Enhancing the Photoactivity of g-C<sub>3</sub>N<sub>4</sub>-based Single-atom Catalysts via Sulphur Doping: A Theoretical Study**

Yanqing Guo,<sup>a</sup> Meng Xia,<sup>a</sup> Mingkun Zhang,<sup>a</sup> Jing Zou,<sup>a</sup> Yue You,<sup>a</sup> Wei Cheng<sup>b</sup> and Junfeng Dou<sup>\*a</sup>

<sup>a</sup> *College of Water Sciences, Beijing Normal University, Beijing 100875, China.*

<sup>b</sup> *Ningbo Institute of Materials Technology and Engineering, Chinese Academy of Sciences, Ningbo 315201, China.*

Table S1 Structure parameters, bond lengths (Å) and bond populations of g-C<sub>3</sub>N<sub>4</sub>, S-g-C<sub>3</sub>N<sub>4</sub>, Pt/g-C<sub>3</sub>N<sub>4</sub> and Pt/S-g-C<sub>3</sub>N<sub>4</sub>.

| Species                               | Structure parameters |      |      | Bond  | Bond length/Å | Bond populations |
|---------------------------------------|----------------------|------|------|-------|---------------|------------------|
|                                       | a/Å                  | b/Å  | c/Å  |       |               |                  |
| g-C <sub>3</sub> N <sub>4</sub>       | 7.15                 | 7.15 | 7.50 | C1-N1 | 1.39          | 0.81             |
|                                       |                      |      |      | C1-N2 | 1.33          | 1.03             |
|                                       |                      |      |      | C2-N2 | 1.34          | 1.04             |
|                                       |                      |      |      | C2-N3 | 1.47          | 0.76             |
| S-g-C <sub>3</sub> N <sub>4</sub>     | 7.16                 | 7.14 | 7.52 | C1-N1 | 1.35          | 0.83             |
|                                       |                      |      |      | C1-S  | 1.74          | 0.44             |
|                                       |                      |      |      | C2-S  | 1.79          | 0.65             |
|                                       |                      |      |      | C2-N3 | 1.44          | 0.79             |
| Pt/ g-C <sub>3</sub> N <sub>4</sub>   | 7.17                 | 7.16 | 7.54 | C1-N1 | 1.36          | 0.84             |
|                                       |                      |      |      | C1-N2 | 1.33          | 1.07             |
|                                       |                      |      |      | C2-N2 | 1.35          | 0.97             |
|                                       |                      |      |      | C2-N3 | 1.45          | 0.80             |
|                                       |                      |      |      | N4-Pt | 2.18          | 0.20             |
|                                       |                      |      |      | N6-Pt | 2.19          | 0.20             |
| Pt/ S-g-C <sub>3</sub> N <sub>4</sub> | 6.95                 | 6.70 | 9.33 | C1-N1 | 1.36          | 0.90             |
|                                       |                      |      |      | C1-S  | 1.81          | 0.59             |
|                                       |                      |      |      | C2-S  | 1.86          | 0.51             |
|                                       |                      |      |      | C2-N3 | 1.44          | 0.75             |
|                                       |                      |      |      | S-Pt  | 2.16          | 0.44             |
|                                       |                      |      |      | N5-Pt | 2.19          | 0.23             |

Table S2 Mulliken charge populations of g-C<sub>3</sub>N<sub>4</sub>, S-g-C<sub>3</sub>N<sub>4</sub>, Pt/g-C<sub>3</sub>N<sub>4</sub> and Pt/S-g-C<sub>3</sub>N<sub>4</sub>.

| Species                              | Atom | Mulliken charge population |       |      |           |
|--------------------------------------|------|----------------------------|-------|------|-----------|
|                                      |      | s                          | p     | d    | Charge/ e |
| g-C <sub>3</sub> N <sub>4</sub>      | C1   | 0.91                       | 2.58  | 0    | 0.51      |
|                                      | C2   | 0.94                       | 2.58  | 0    | 0.48      |
|                                      | N1   | 1.41                       | 3.92  | 0    | -0.33     |
|                                      | N2   | 1.53                       | 3.85  | 0    | -0.39     |
|                                      | N3   | 1.43                       | 3.87  | 0    | -0.30     |
|                                      | N4   | 1.53                       | 3.85  | 0    | -0.39     |
|                                      | N5   | 1.53                       | 3.85  | 0    | -0.39     |
| S-g-C <sub>3</sub> N <sub>4</sub>    | C1   | 1.05                       | 2.77  | 0    | 0.18      |
|                                      | C2   | 1.05                       | 2.80  | 0    | 0.15      |
|                                      | N1   | 1.41                       | 3.93  | 0    | -0.34     |
|                                      | N3   | 1.43                       | 3.86  | 0    | -0.28     |
|                                      | N4   | 1.50                       | 3.96  | 0    | -0.46     |
|                                      | N5   | 1.54                       | 3.86  | 0    | -0.40     |
|                                      | N6   | 1.52                       | 3.87  | 0    | -0.40     |
| Pt/g-C <sub>3</sub> N <sub>4</sub>   | S    | 1.82                       | 3.72  | 0    | 0.46      |
|                                      | C1   | 0.91                       | 2.62  | 0    | 0.47      |
|                                      | C2   | 0.94                       | 2.61  | 0    | 0.45      |
|                                      | N1   | 1.40                       | 3.95  | 0    | -0.35     |
|                                      | N2   | 1.52                       | 3.92  | 0    | -0.44     |
|                                      | N3   | 1.42                       | 3.87  | 0    | -0.29     |
|                                      | N4   | 1.53                       | 3.90  | 0    | -0.44     |
| Pt/S-g-C <sub>3</sub> N <sub>4</sub> | N5   | 1.51                       | 3.92  | 0    | -0.43     |
|                                      | N6   | 1.53                       | 3.90  | 0    | -0.44     |
|                                      | Pt   | 0.57                       | -0.16 | 8.81 | 0.77      |
|                                      | C1   | 1.06                       | 2.75  | 0    | 0.19      |
|                                      | C2   | 1.07                       | 2.79  | 0    | 0.14      |
|                                      | N1   | 1.41                       | 3.92  | 0    | -0.32     |
|                                      | N3   | 1.40                       | 3.89  | 0    | -0.28     |
| Pt/S-g-C <sub>3</sub> N <sub>4</sub> | N4   | 1.55                       | 3.86  | 0    | -0.42     |
|                                      | N5   | 1.54                       | 3.92  | 0    | -0.46     |
|                                      | N6   | 1.53                       | 3.87  | 0    | -0.40     |
|                                      | S    | 1.78                       | 3.86  | 0    | 0.37      |
|                                      | Pt   | 0.72                       | -0.12 | 9.18 | 0.22      |

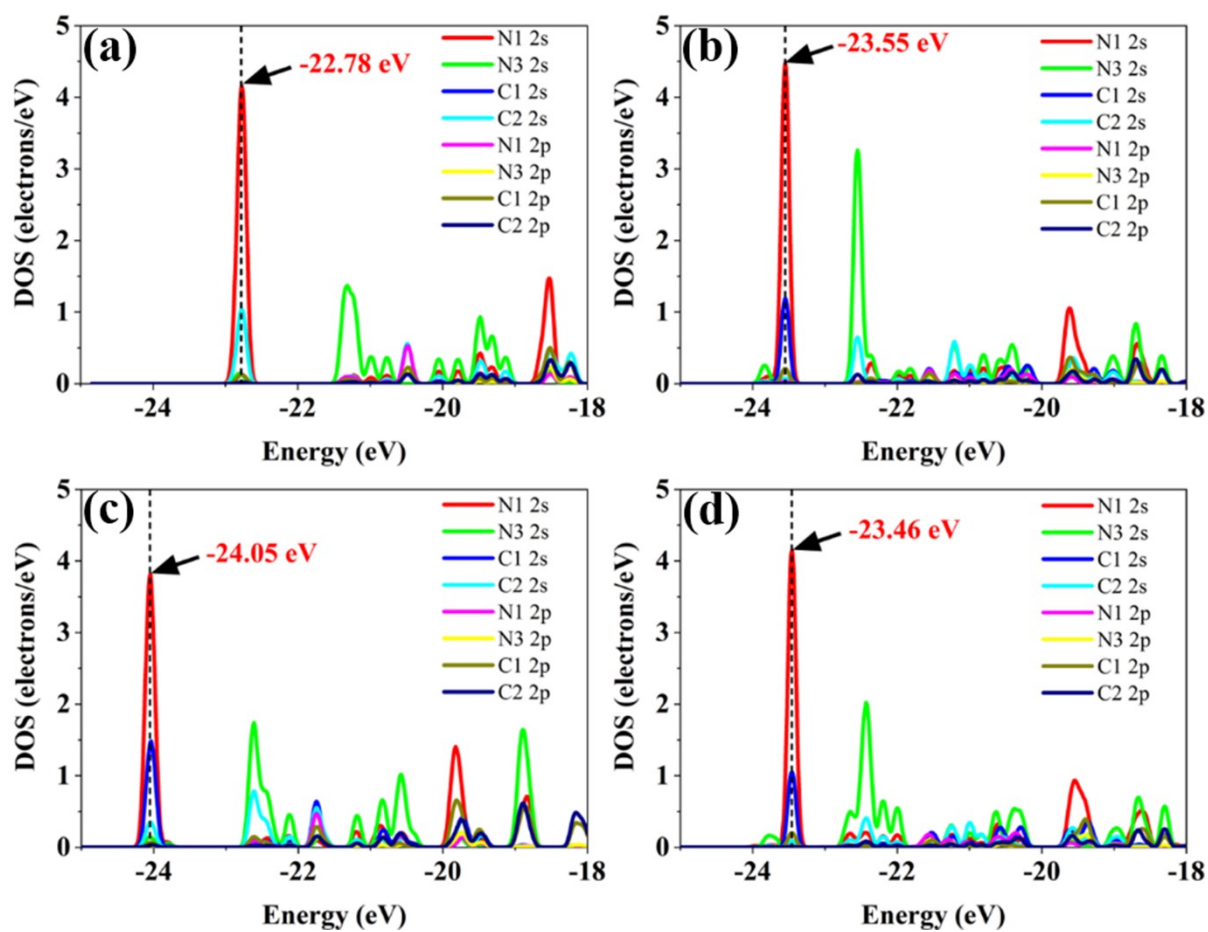

Fig. S1 Density of states of deep states of  $\text{g-C}_3\text{N}_4$  (a),  $\text{S-g-C}_3\text{N}_4$  (b),  $\text{Pt/g-C}_3\text{N}_4$  (c) and  $\text{Pt/S-g-C}_3\text{N}_4$  (d), where the N1 2s state marked by an arrow is used as the reference.

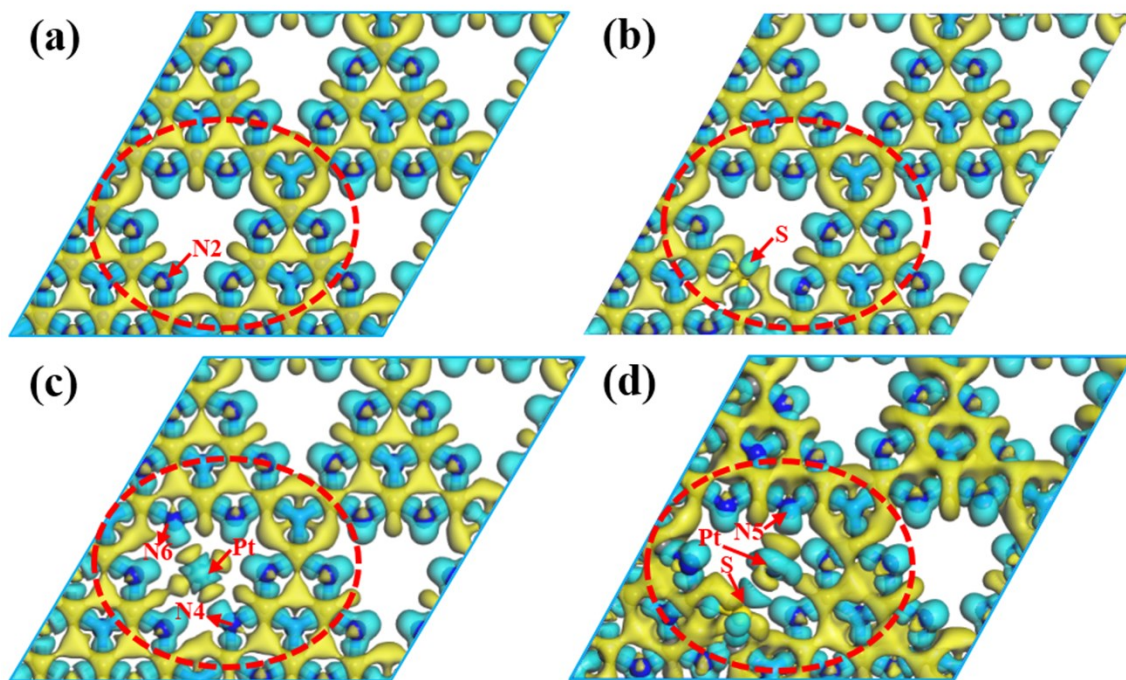

Fig. S2 Calculated electron density difference of g-C<sub>3</sub>N<sub>4</sub> (a), S-g-C<sub>3</sub>N<sub>4</sub> (b), Pt/g-C<sub>3</sub>N<sub>4</sub> (c) and Pt/S-g-C<sub>3</sub>N<sub>4</sub> (d). The cyan region indicates electron accumulation, and the olive color region represents electron depletion. The isovalue is set as 0.05 electron/Å<sup>3</sup>.

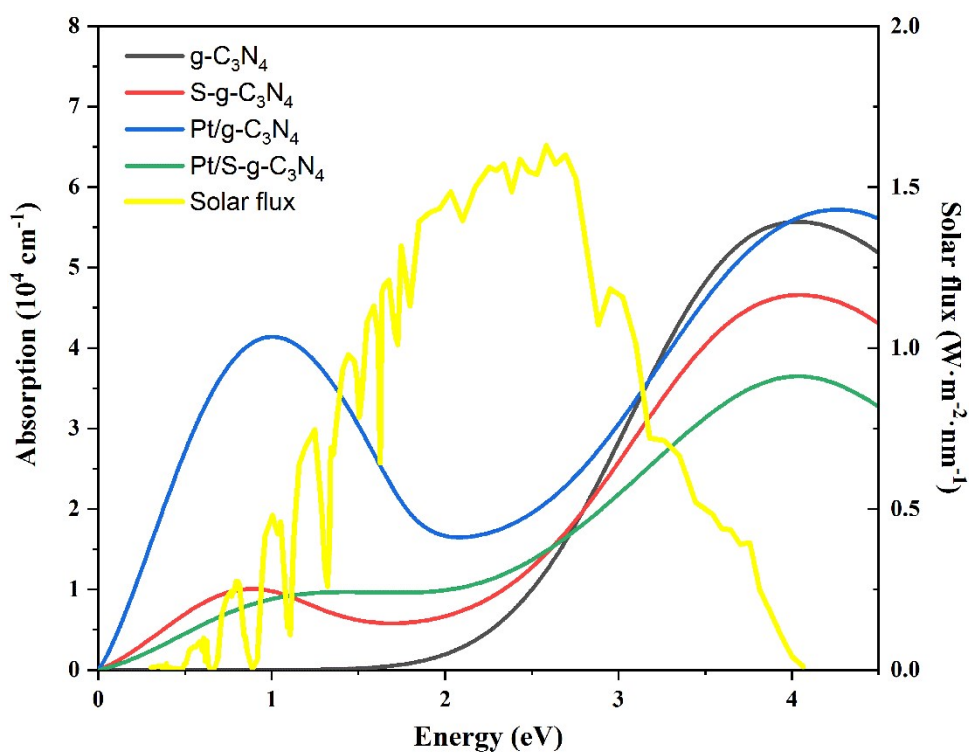

Fig. S3 Absorption spectrum of g-C<sub>3</sub>N<sub>4</sub>, S-g-C<sub>3</sub>N<sub>4</sub>, Pt/g-C<sub>3</sub>N<sub>4</sub> and Pt/S-g-C<sub>3</sub>N<sub>4</sub>.
